# Supplementary material for: Association between Objectively Measured Physical Activity and Arterial Stiffness in Children with Congenital Heart Disease
Source: MDPI journal article supplement (doi:10.3390/jcm10153266), 2021-07-24
Supplement: s1 [file s1]

## Supplementary

Table S1.: Association between surrogates of arterial stiffness and MVPA adjusted for age, sex, BMI z-score, peripheral systolic blood pressure and heart rate, separated for patients treated with antihypertensive drugs and untreated patients.

|                  | <b>Adjusted R<sup>2</sup></b> | <b>ß</b> | <b>95%CI</b>    | <b>p-value</b> |
|------------------|-------------------------------|----------|-----------------|----------------|
| <b>UNTREATED</b> |                               |          |                 |                |
| PWV (m/s)        | 0.735                         | -0.180   | [-0.001; 0.001] | 0.611          |
| cSBP (mmHg)      | 0.747                         | 0.002    | [-0.027; 0.028] | 0.959          |
| <b>TREATED</b>   |                               |          |                 |                |
| PWV (m/s)        | 0.828                         | -0.060   | [-0.003; 0.001] | 0.427          |
| cSBP (mmHg)      | 0.748                         | -0.128   | [-0.160; 0.027] | 0.158          |

cSBP=central systolic blood pressure, MVPA= moderate to vigorous physical activity, PWV = pulse wave velocity

Table S2.: Physical activity level based on MVPA of different CHD severities after adjusting for age, sex and BMI z-score.

| <b>CHD Severity</b> | <b>Estimated marginal means<br/>MVPA (min/day)</b> | <b>Standard error</b> | <b>95%-CI</b> |
|---------------------|----------------------------------------------------|-----------------------|---------------|
| Complex CHD         | 84.5                                               | 2.1                   | [80.4 – 88.7] |
| Moderate CHD        | 80.7                                               | 2.5                   | [75.8 – 85.6] |
| Simple CHD          | 86.7                                               | 3.2                   | [80.4 – 93.0] |

Corrected for age, sex and BMI z-score. CHD = congenital heart disease, CI = confidence interval, MVPA= moderate to vigorous physical activity
